# Supplementary material for: Optimization of parathyroid 11C-choline PET protocol for localization of parathyroid adenomas in patients with primary hyperparathyroidism
Source: Springer Nature journal article supplement (doi:10.1186/s13550-019-0534-5), 2019-07-31
Supplement: MOESM1 [file 17026944]

**Optimization of parathyroid <sup>11</sup>C-choline PET protocol for localization of parathyroid adenomas in patients with primary hyperparathyroidism**

Milou E Noltes, Schelto Kruijff, Walter Noordzij, Eef D Telenga, David Vallez Garca, Malgorzata Trofimiuk-Mildner, Marta Opalinska, Alicja Hubalewska-Dydejczyk, Gert Luurtsema, Rudi AJO Dierckx, Mostafa El Mounni, Ronald Boellaard, Adrienne H Brouwers

**Correspondence to:**

A.H. Brouwers, MD, PhD

Department of Nuclear Medicine and Molecular Imaging

University Medical Center Groningen

[a.h.brouwers@umcg.nl](mailto:a.h.brouwers@umcg.nl)

**Additional file 1: Corrected calcium**

Corrected calcium was calculated using the following formula:  $Ca + ((40 - Alb) \times 0.02)$ . ‘Ca’ is the serum calcium (mmol/L) and ‘Alb’ is the serum albumin (g/l).
